# Supplementary material
Source: Frontiers journal article supplement (https://www.frontiersin.org/articles/437466)
Supplement: Table_1.docx [file Table_1.docx]

Supplementary Material

Residents in Seattle, WA Report Differential Use of Free-floating Bikeshare by Age, Gender, Race, and Location

Jana Hirsch*, Ian Steward, Sianna Ziegler, Ben Richter, Stephen J. Mooney4

*** Correspondence:** Corresponding Author: jah474@drexel.edu

# Supplementary Tables

| Dimension | Question | Options |
| --- | --- | --- |
| Familiarity | Currently, three companies —LimeBike, ofo, and Spin —operate free-floating, dock-less bike share programs in Seattle, where riders can rent one of the green, yellow, or orange bikes you may have seen around town using a smartphone app. How familiar would you say you are with these bike share programs? | Very Familiar  Somewhat Familiar  Not Too Familiar  Not at all Familiar |
| Use | In the last six months, about how many times have you ridden one of the green, yellow, or orange bikes that are part of one of the bike share programs currently operating in Seattle? | I have not used a bike share in the last six months, and I do not plan to in the future  I have not used a bike share in the last six months, but I am open to using one in the future 1 to 2 times3 to 10 times 11 to 20 times  More than 20 times |
| Barriers or Drawbacks | Regardless of how often you use these bike share programs personally, please indicate how strongly you agree or disagree with the following statements.  There are too few bike shares near me when I need one (Spatial Access Barrier)  The bike shares don’t fit my size or physical needs (Physical Barrier)  The bike share apps are difficult to use, or don’t work reliably (Technology Barrier)  The bike shares aren’t well-maintained (Maintenance Barrier)  The companies that operate the bike shares don’t respond quickly enough to requests (Maintenance Barrier)  There aren’t enough bike trails or protected bike lanes where I want to go (Environmental Barrier; Safety Barrier)  Bike shares are too expensive for me to use them frequently (Cost Barrier)  The weight of the bike shares makes them difficult to use safely in traffic or going up hills (Physical Barrier; Safety Barrier)  Too many bike share users ride without helmets (Safety Barrier)  Bike shares are often parked in the middle of sidewalks or blocking curb ramps, making it more difficult for those with visual and physical disabilities to get around the city (Social Barrier)  Too many bike shares wind up toppled over, littered in parks, dumped in ditches, and left in other places where they don’t belong (Social Barrier) | Strongly Agree  Somewhat Agree  Not sure  Somewhat Disagree  Strongly Disagree |
| Openness to future use | From “In the last six months, about how many times have you ridden one of the green, yellow, or orange bikes that are part of one of the bike share programs currently operating in Seattle?” | Response “I have not used a bike share in the last six months but I am open to using one in the future.” |
| City Region | ZIPcode | North Seattle (98103, 98105, 98107, 98115, 98117, 98125, 98133, 98177)  Central Seattle (98101, 98102, 98104, 98109, 98112, 98119, 98121, 98122, 98134, 98144, 98164, 98199)  South Seattle (98106, 98108, 98116, 98118, 98126, 98136, 98146, 98178) |
